# Supplementary material
Source: publisher figshare collection journal article supplement (https://frontiersin.figshare.com/ndownloader/files/14520959)
Supplement: Supplementary file [file 14520959]

Table S1: Demographics of respondents

| Demographics                                   | Total<br>(n=680) |     |
|------------------------------------------------|------------------|-----|
| Functional Area (Key area of work)             |                  |     |
| 1) Clinical Research                           | 311              | 46% |
| 2) Medical Affairs                             | 76               | 11% |
| 3) Regulatory Affairs                          | 29               | 4%  |
| 4) Business Development                        | 5                | 1%  |
| 5) Safety and Risk Management (Safety Affairs) | 50               | 7%  |
| 6) Data Management                             | 38               | 6%  |
| 7) Clinical Operations                         | 52               | 8%  |
| 8) Overall Management                          | 50               | 7%  |
| 9) Other                                       | 69               | 10% |
| Place of Employment                            |                  |     |
| 1) Sponsor (Pharma / Biotech) Organization     | 364              | 54% |
| 2) Contract Research Organization (CRO)        | 177              | 26% |
| 3) Investigational Site                        | 16               | 2%  |
| 4) Academic Medical Center                     | 33               | 5%  |
| 5) Academic Institution                        | 15               | 2%  |
| 6) Public Hospital                             | 11               | 2%  |
| 7) Private Hospital                            | 1                | 0%  |
| 8) Regulatory Agency                           | 1                | 0%  |
| 9) Professional Associations                   | 5                | 1%  |
| 10) Other                                      | 57               | 8%  |
| Level of Experience                            |                  |     |
| 1) 0-2 years                                   | 75               | 11% |
| 2) 3-5 years                                   | 94               | 14% |
| 3) 6-9 years                                   | 113              | 17% |
| 4) over 10 years                               | 398              | 59% |
| Member of IFAPP national member association*   |                  |     |
| 1) Yes                                         | 74               | 26% |
| 2) No                                          | 216              | 74% |

\*: Not detected in Japan
